# Supplementary material for: Effect of Smartphone-Enabled Health Monitoring Devices vs Regular Follow-up on Blood Pressure Control Among Patients After Myocardial Infarction: A Randomized Clinical Trial
Source: PubMed Central journal article supplement (PMC7163406; doi:10.1001/jamanetworkopen.2020.2165), 2020-04-16
Supplement: jamanetwopen-3-e202165-s003.pdf [file jamanetwopen-3-e202165-s003.pdf]

## Data Sharing Statement

Treskes. Effect of Smartphone-Enabled Health Monitoring Devices vs Regular Follow-up on Blood Pressure Control Among Patients After Myocardial Infarction. *JAMA Netw Open*. Published April 16, 2020. 10.1001/jamanetworkopen.2020.2165

### Data

**Data available:** No

### Additional Information

**Explanation for why data not available:** The European Privacy Law doesn't allow us to make data obtained for research publicly available
